# Supplementary material for: Attitudes Towards Coronavirus (COVID-19) Vaccine and Sources of Information Across Diverse Ethnic Groups in the UK: a Qualitative Study
Source: medRxiv preprint, doi:10.1101/2022.02.04.22270456, version 1 (2022-02-06)
Supplement: Supplementary 2 [file 270456_file04.docx]

# Attitudes Towards Coronavirus (COVID-19) Vaccine and Sources of Information Across Diverse Ethnic Groups in the UK: a Qualitative Study

## Authorship and Affiliations

1. Eirwen Sides (Lead and Corresponding Author)
   1. BSc, Research Assistant
   2. Primary Care and Interventions Unit, Public Health England, Twyver House, Bruton Way, Gloucester, GL1 1PB
   3. [Eirwen.Sides@phe.gov.uk](mailto:Eirwen.Sides@phe.gov.uk)
   4. Telephone/ fax: +442084953257
   5. <https://orcid.org/0000-0002-9414-5037>
2. Leah Ffion Jones, PhD, Behavioural Science Team Leader, Behavioural Science and Insights Unit, Public Health England <https://orcid.org/0000-0002-0448-3471>
3. Atiya Kamal, PhD, Senior Lecturer in Health Psychology, School of Social Sciences, Birmingham City University <https://orcid.org/0000-0002-6651-6400>
4. Amy Thomas, MSc, Research Assistant, Primary Care and Interventions Unit, Public Health England <https://orcid.org/0000-0003-2425-0699>
5. Rowshonara B Syeda, MSc, Research Assistant, Primary Care and Interventions Unit, Public Health England
6. Awatif Kaissi, MSc, Research Assistant, Primary Care and Interventions Unit, Public Health England
7. Donna M Lecky, PhD, Head of Unit, Primary Care and Interventions Unit, Public Health England <https://orcid.org/0000-0002-1223-9356>
8. Mahendra G Patel, PhD FRPharmS FHEA, Alumni Fellow NICE, Honorary Visiting Professor, University of Bradford
9. Laura B Nellums, PhD, Assistant Professor in Global Health, Faculty of Medicine & Health Sciences, University of Nottingham, <https://orcid.org/0000-0002-2534-6951>
10. Jane Greenway, Health Practitioner, Public Health England
11. Ines Campos-Matos, Consultant Epidemiologist and Head of Inclusion Health, Public Health England <https://orcid.org/0000-0002-6480-4310>
12. Rashmi Shukla, Director for Midlands and East Region, Public Health England
13. Colin Stewart Brown, Head of Healthcare Associated Infections and Antimicrobial Resistance Division, National Infection Service, Public Health England
14. Manish Pareek, Associate Clinical Professor in Infectious Diseases, Department of Respiratory Sciences, University of Leicester
15. Loretta Sollars, Head of Health Inequalities & Deputy Head Children, Young People and Families, Public Health England <https://orcid.org/0000-0002-4751-029X>
16. Emma Pawson, Head of Regional Engagement and Strategy, Public Health England
17. Cliodna AM McNulty, FRCPathol, Head of Unit to December 2020, (now retired) Primary Care and Interventions Unit, Public Health England <https://orcid.org/0000-0003-4969-5360>

## Abstract

### Objectives

To explore attitudes and intentions towards COVID-19 vaccination, and influences and sources of information about COVID-19 across diverse ethnic groups (EGs) in the UK.

### Design

Remote qualitative interviews and focus groups (FGs) conducted June-October 2020 before UK COVID-19 vaccine approval. Data were transcribed and analysed through inductive thematic analysis.

### Setting

General public in the community across England and Wales.

### Participants

100 participants from 19 self-identified EGs with spoken English or Punjabi.

### Results

Mistrust and doubt were common themes across all EGs including white British and minority EGs, but more pronounced amongst Bangladeshi, Pakistani, Black ethnicities and Travellers. Many participants shared concerns about perceived lack of information about COVID-19 vaccine safety, efficacy and potential unknown adverse effects. Across EGs participants stated occupations with public contact, older adults and vulnerable groups should be prioritised for vaccination. Perceived risk, social influences, occupation, age, co-morbidities and engagement with healthcare influenced participants’ intentions to accept vaccination once available; all Jewish FG participants intended to accept, while all Traveller FG participants indicated they probably would not.

Facilitators to COVID-19 vaccine uptake across all EGs included: desire to return to normality and protect health and wellbeing; perceived higher risk of infection; evidence of vaccine safety and efficacy; vaccine availability and accessibility.

COVID-19 information sources were influenced by social factors, culture and religion and included: friends, family; media and news outlets; and research literature. Participants across most different EGs were concerned about misinformation or had negative attitudes towards the media.

### Conclusions

During vaccination programme roll-out, including boosters, commissioners and vaccine providers should provide accurate information, authentic community outreach, and use appropriate channels to disseminate information and counter misinformation. Adopting a context-specific approach to vaccine resources, interventions and policies and empowering communities has potential to increase trust in the programme.

#
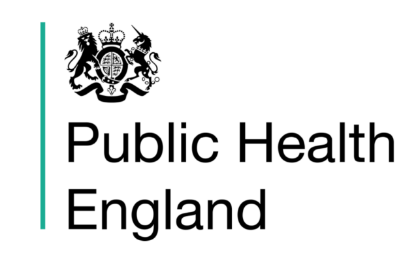


# Take part in a 60 minute group discussion and earn £25

Public Health England are looking for individuals to take part in **60 minute** discussions all around experiences of the **COVID-19 pandemic**.

We are specifically looking to recruit individuals from **minority ethnic backgrounds**.

Discussions will focus on your experiences of COVID-19, such as physical distancing, your perceptions of vaccines and testing, shielding at risk individuals, how you’ve coped and managed under the government guidelines and your health related behaviours.

The aim of this work is to inform interventions to help minority ethnic groups during this pandemic, and to also inform the development of a general self-care leaflet.

**We are offering everyone who takes part £25 for their time.**

If you are interested in taking part, or would like more information, please contact the lead researcher at the following details:

**Leah Jones, Research Project Support Officer, Public Health England**

[**Leah.jones@phe.gov.uk**](mailto:Leah.jones@phe.gov.uk)

**+442084953256**


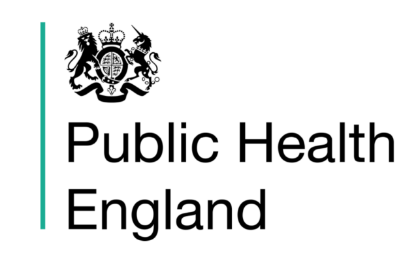


# Take part in a 60 minute group discussion and earn £25

Public Health England are looking for individuals to take part in **60 minute** discussions all around experiences of the **COVID-19 pandemic**. We are interested in understanding how experiences may be different across different ethnic groups.

For the next focus group we are specifically looking to recruit **white British individuals** from a range of ages, genders and backgrounds.

Discussions will focus on your experiences of COVID-19, such as physical distancing, how you’ve coped and managed under the government guidelines and your health-related behaviours.

**We are offering everyone who takes part £25 for their time.**

If you are interested in taking part, or would like more information, please contact the lead researcher at the following details:

**Leah Jones, Research Project Support Officer, Public Health England**

[**Leah.jones@phe.gov.uk**](mailto:Leah.jones@phe.gov.uk)

**+442084953256**
