# Supplementary material for: Attitudes Towards Coronavirus (COVID-19) Vaccine and Sources of Information Across Diverse Ethnic Groups in the UK: a Qualitative Study
Source: medRxiv preprint, doi:10.1101/2022.02.04.22270456, version 1 (2022-02-06)
Supplement: Supplementary 3 [file 270456_file05.docx]

# Attitudes Towards Coronavirus (COVID-19) Vaccine and Sources of Information Across Diverse Ethnic Groups in the UK: a Qualitative Study

## Authorship and Affiliations

1. Eirwen Sides (Lead and Corresponding Author)
   1. BSc, Research Assistant
   2. Primary Care and Interventions Unit, Public Health England, Twyver House, Bruton Way, Gloucester, GL1 1PB
   3. [Eirwen.Sides@phe.gov.uk](mailto:Eirwen.Sides@phe.gov.uk)
   4. Telephone/ fax: +442084953257
   5. <https://orcid.org/0000-0002-9414-5037>
2. Leah Ffion Jones, PhD, Behavioural Science Team Leader, Behavioural Science and Insights Unit, Public Health England <https://orcid.org/0000-0002-0448-3471>
3. Atiya Kamal, PhD, Senior Lecturer in Health Psychology, School of Social Sciences, Birmingham City University <https://orcid.org/0000-0002-6651-6400>
4. Amy Thomas, MSc, Research Assistant, Primary Care and Interventions Unit, Public Health England <https://orcid.org/0000-0003-2425-0699>
5. Rowshonara B Syeda, MSc, Research Assistant, Primary Care and Interventions Unit, Public Health England
6. Awatif Kaissi, MSc, Research Assistant, Primary Care and Interventions Unit, Public Health England
7. Donna M Lecky, PhD, Head of Unit, Primary Care and Interventions Unit, Public Health England <https://orcid.org/0000-0002-1223-9356>
8. Mahendra G Patel, PhD FRPharmS FHEA, Alumni Fellow NICE, Honorary Visiting Professor, University of Bradford
9. Laura B Nellums, PhD, Assistant Professor in Global Health, Faculty of Medicine & Health Sciences, University of Nottingham, <https://orcid.org/0000-0002-2534-6951>
10. Jane Greenway, Health Practitioner, Public Health England
11. Ines Campos-Matos, Consultant Epidemiologist and Head of Inclusion Health, Public Health England <https://orcid.org/0000-0002-6480-4310>
12. Rashmi Shukla, Director for Midlands and East Region, Public Health England
13. Colin Stewart Brown, Head of Healthcare Associated Infections and Antimicrobial Resistance Division, National Infection Service, Public Health England
14. Manish Pareek, Associate Clinical Professor in Infectious Diseases, Department of Respiratory Sciences, University of Leicester
15. Loretta Sollars, Head of Health Inequalities & Deputy Head Children, Young People and Families, Public Health England <https://orcid.org/0000-0002-4751-029X>
16. Emma Pawson, Head of Regional Engagement and Strategy, Public Health England
17. Cliodna AM McNulty, FRCPathol, Head of Unit to December 2020, (now retired) Primary Care and Interventions Unit, Public Health England <https://orcid.org/0000-0003-4969-5360>

## Abstract

### Objectives

To explore attitudes and intentions towards COVID-19 vaccination, and influences and sources of information about COVID-19 across diverse ethnic groups (EGs) in the UK.

### Design

Remote qualitative interviews and focus groups (FGs) conducted June-October 2020 before UK COVID-19 vaccine approval. Data were transcribed and analysed through inductive thematic analysis.

### Setting

General public in the community across England and Wales.

### Participants

100 participants from 19 self-identified EGs with spoken English or Punjabi.

### Results

Mistrust and doubt were common themes across all EGs including white British and minority EGs, but more pronounced amongst Bangladeshi, Pakistani, Black ethnicities and Travellers. Many participants shared concerns about perceived lack of information about COVID-19 vaccine safety, efficacy and potential unknown adverse effects. Across EGs participants stated occupations with public contact, older adults and vulnerable groups should be prioritised for vaccination. Perceived risk, social influences, occupation, age, co-morbidities and engagement with healthcare influenced participants’ intentions to accept vaccination once available; all Jewish FG participants intended to accept, while all Traveller FG participants indicated they probably would not.

Facilitators to COVID-19 vaccine uptake across all EGs included: desire to return to normality and protect health and wellbeing; perceived higher risk of infection; evidence of vaccine safety and efficacy; vaccine availability and accessibility.

COVID-19 information sources were influenced by social factors, culture and religion and included: friends, family; media and news outlets; and research literature. Participants across most different EGs were concerned about misinformation or had negative attitudes towards the media.

### Conclusions

During vaccination programme roll-out, including boosters, commissioners and vaccine providers should provide accurate information, authentic community outreach, and use appropriate channels to disseminate information and counter misinformation. Adopting a context-specific approach to vaccine resources, interventions and policies and empowering communities has potential to increase trust in the programme.

**Supplementary 4.** Focus group ethnicity and gender breakdown

| **Focus group (FG) name and gender of participants** | **Self-reported ethnicity breakdown** | **n** |
| --- | --- | --- |
| FG1  5F, 2M | Bangladeshi | 2 |
| Indian/Mauritian | 1 |
| Latin American | 1 |
| Pakistani | 1 |
| Sri Lankan | 1 |
| Unknown | 1 |
| FG2  4F | Asian | 1 |
| Black African | 1 |
| Latin American | 1 |
| Pakistani | 1 |
| FG3  1F, 3M | Bangladeshi | 2 |
| Black Caribbean | 1 |
| Chinese | 1 |
| FG4  3F, 1M | Bangladeshi | 3 |
| Sri Lankan | 1 |
| FG5  2F, 1M | Asian | 1 |
| Black African | 1 |
| Pakistani | 1 |
| FG6  4F, 1M | Pakistani | 5 |
|  |  |
| FG7  1F, 1M, 1 Unknown | Chinese | 3 |
|  |  |
| FG8  2F, 3M | Black African | 3 |
| Black Caribbean | 2 |
| FG9  2F, 4M | Indian | 5 |
| Indian/Mauritian | 1 |
| FG10  3F, 2M | Bangladeshi | 5 |
|  |  |
| FG11  1F, 1M | Lithuanian | 1 |
| Polish | 1 |
| FG12  2F, 2M | Chinese | 4 |
|  |  |
| FG13  2F | Arabic | 2 |
|  |  |
| FG14  1F, 5M | Indian | 5 |
| Vietnamese | 1 |
| FG15  3M | Bangladeshi | 3 |
|  |  |
| FG16  2F, 2M | Black | 2 |
| Black African | 1 |
| Black British | 1 |
| FG17  1F, 1M | Chinese | 2 |
|  |  |
| FG18  1F, 3M | Indian | 4 |
|  |  |
| FG19  3M | Bangladeshi | 1 |
| Pakistani | 2 |
| FG20  1F, 3M | White British | 4 |
|  |  |
| FG21  3F, 4M | Jewish | 7 |
|  |  |
| FG22  1F, 2M | White British | 3 |
|  |  |
| FG23  1F, 2M | Black African | 3 |
|  |  |
| FG24  3F, 1M | Traveller | 4 |
|  |  |
| Interview 1  1F | Pakistani | 1 |
|  |  |
| Interview 2  1F | Pakistani | 1 |
|  |  |
| Interview 3  1F | Pakistani | 1 |
|  |  |
