# Supplementary material for: Attitudes Towards Coronavirus (COVID-19) Vaccine and Sources of Information Across Diverse Ethnic Groups in the UK: a Qualitative Study
Source: medRxiv preprint, doi:10.1101/2022.02.04.22270456, version 1 (2022-02-06)
Supplement: Supplementary 4 [file 270456_file06.docx]

# Attitudes Towards Coronavirus (COVID-19) Vaccine and Sources of Information Across Diverse Ethnic Groups in the UK: a Qualitative Study

## Authorship and Affiliations

1. Eirwen Sides (Lead and Corresponding Author)
   1. BSc, Research Assistant
   2. Primary Care and Interventions Unit, Public Health England, Twyver House, Bruton Way, Gloucester, GL1 1PB
   3. [Eirwen.Sides@phe.gov.uk](mailto:Eirwen.Sides@phe.gov.uk)
   4. Telephone/ fax: +442084953257
   5. <https://orcid.org/0000-0002-9414-5037>
2. Leah Ffion Jones, PhD, Behavioural Science Team Leader, Behavioural Science and Insights Unit, Public Health England <https://orcid.org/0000-0002-0448-3471>
3. Atiya Kamal, PhD, Senior Lecturer in Health Psychology, School of Social Sciences, Birmingham City University <https://orcid.org/0000-0002-6651-6400>
4. Amy Thomas, MSc, Research Assistant, Primary Care and Interventions Unit, Public Health England <https://orcid.org/0000-0003-2425-0699>
5. Rowshonara B Syeda, MSc, Research Assistant, Primary Care and Interventions Unit, Public Health England
6. Awatif Kaissi, MSc, Research Assistant, Primary Care and Interventions Unit, Public Health England
7. Donna M Lecky, PhD, Head of Unit, Primary Care and Interventions Unit, Public Health England <https://orcid.org/0000-0002-1223-9356>
8. Mahendra G Patel, PhD FRPharmS FHEA, Alumni Fellow NICE, Honorary Visiting Professor, University of Bradford
9. Laura B Nellums, PhD, Assistant Professor in Global Health, Faculty of Medicine & Health Sciences, University of Nottingham, <https://orcid.org/0000-0002-2534-6951>
10. Jane Greenway, Health Practitioner, Public Health England
11. Ines Campos-Matos, Consultant Epidemiologist and Head of Inclusion Health, Public Health England <https://orcid.org/0000-0002-6480-4310>
12. Rashmi Shukla, Director for Midlands and East Region, Public Health England
13. Colin Stewart Brown, Head of Healthcare Associated Infections and Antimicrobial Resistance Division, National Infection Service, Public Health England
14. Manish Pareek, Associate Clinical Professor in Infectious Diseases, Department of Respiratory Sciences, University of Leicester
15. Loretta Sollars, Head of Health Inequalities & Deputy Head Children, Young People and Families, Public Health England <https://orcid.org/0000-0002-4751-029X>
16. Emma Pawson, Head of Regional Engagement and Strategy, Public Health England
17. Cliodna AM McNulty, FRCPathol, Head of Unit to December 2020, (now retired) Primary Care and Interventions Unit, Public Health England <https://orcid.org/0000-0003-4969-5360>

## Abstract

### Objectives

To explore attitudes and intentions towards COVID-19 vaccination, and influences and sources of information about COVID-19 across diverse ethnic groups (EGs) in the UK.

### Design

Remote qualitative interviews and focus groups (FGs) conducted June-October 2020 before UK COVID-19 vaccine approval. Data were transcribed and analysed through inductive thematic analysis.

### Setting

General public in the community across England and Wales.

### Participants

100 participants from 19 self-identified EGs with spoken English or Punjabi.

### Results

Mistrust and doubt were common themes across all EGs including white British and minority EGs, but more pronounced amongst Bangladeshi, Pakistani, Black ethnicities and Travellers. Many participants shared concerns about perceived lack of information about COVID-19 vaccine safety, efficacy and potential unknown adverse effects. Across EGs participants stated occupations with public contact, older adults and vulnerable groups should be prioritised for vaccination. Perceived risk, social influences, occupation, age, co-morbidities and engagement with healthcare influenced participants’ intentions to accept vaccination once available; all Jewish FG participants intended to accept, while all Traveller FG participants indicated they probably would not.

Facilitators to COVID-19 vaccine uptake across all EGs included: desire to return to normality and protect health and wellbeing; perceived higher risk of infection; evidence of vaccine safety and efficacy; vaccine availability and accessibility.

COVID-19 information sources were influenced by social factors, culture and religion and included: friends, family; media and news outlets; and research literature. Participants across most different EGs were concerned about misinformation or had negative attitudes towards the media.

### Conclusions

During vaccination programme roll-out, including boosters, commissioners and vaccine providers should provide accurate information, authentic community outreach, and use appropriate channels to disseminate information and counter misinformation. Adopting a context-specific approach to vaccine resources, interventions and policies and empowering communities has potential to increase trust in the programme.

SRQR Reporting checklist for qualitative study.

**Instructions to authors**

Complete this checklist by entering the page numbers from your manuscript where readers will find each of the items listed below. SRQR reporting guidelines: O'Brien BC, Harris IB, Beckman TJ, Reed DA, Cook DA. Standards for reporting qualitative research: a synthesis of recommendations. Acad Med. 2014;89(9):1245-1251.

| No. | Topic | Reporting Item | Page no. |
| --- | --- | --- | --- |
|  | **Title and abstract** |  |  |
| S1 | Title | Concise description of the nature and topic of the study Identifying  the study as qualitative or indicating the approach (e.g., ethnography,  grounded theory) or data collection methods (e.g., interview, focus  group) is recommended | 1 |
| S2 | Abstract | Summary of key elements of the study using the abstract format of  the intended publication; typically includes background, purpose,  methods, results, and conclusions | 1-2 |
|  | **Introduction** |  |  |
| S3 | Problem formulation | Description and significance of the problem/phenomenon studied;  review of relevant theory and empirical work; problem statement | 3 |
| S4 | Purpose of research or question | Purpose of the study and specific objectives or questions | 3 |
|  | **Methods** |  |  |
| S5 | Qualitative approach and research paradigm | Qualitative approach (e.g., ethnography, grounded theory, case study,  phenomenology, narrative research) and guiding theory if appropriate;  identifying the research paradigm (e.g., postpositivist, constructivist/  interpretivist) is also recommended; rationale | 3 |
| S6 | Research characteristics and reflexivity | Researchers’ characteristics that may influence the research, including  personal attributes, qualifications/experience, relationship with  participants, assumptions, and/or presuppositions; potential or actual  interaction between researchers’ characteristics and the research  questions, approach, methods, results, and/or transferability | 4 |
| S7 | Context | Setting/site and salient contextual factors; rationale | 3-4 |
| S8 | Sampling strategy | How and why research participants, documents, or events were  selected; criteria for deciding when no further sampling was necessary  (e.g., sampling saturation); rationale | 3-4 |
| S9 | Ethical issues pertaining to human subjects | Documentation of approval by an appropriate ethics review board  and participant consent, or explanation for lack thereof; other  confidentiality and data security issues | 4 |
| S10 | Data collection methods | Types of data collected; details of data collection procedures including  (as appropriate) start and stop dates of data collection and analysis,  iterative process, triangulation of sources/methods, and modification  of procedures in response to evolving study findings; rationale | 4 |
| S11 | Data collection instruments and technologies | Description of instruments (e.g., interview guides, questionnaires)  and devices (e.g., audio recorders) used for data collection; if/how the  instrument(s) changed over the course of the study | 4 |
| S12 | Units of study | Number and relevant characteristics of participants, documents, or  events included in the study; level of participation (could be reported  in results) | 5 |
| S13 | Data processing | Methods for processing data prior to and during analysis, including  transcription, data entry, data management and security, verification  of data integrity, data coding, and anonymization/deidentification of  excerpts | 4 |
| S14 | Data analysis | Process by which inferences, themes, etc., were identified and  developed, including the researchers involved in data analysis; usually  references a specific paradigm or approach; rationale | 4 |
| S15 | Techniques to enhance trustworthiness | Techniques to enhance trustworthiness and credibility of data analysis  (e.g., member checking, audit trail, triangulation); rationale | 3-4 |
|  | **Results/Findings** |  |  |
| S16 | Synthesis and interpretation | Main findings (e.g., interpretations, inferences, and themes); might  include development of a theory or model, or integration with prior  research or theory | 5-18 |
| S17 | Links to empirical data | Evidence (e.g., quotes, field notes, text excerpts, photographs) to  substantiate analytic findings | 5-18 and supplementary files |
|  | **Discussion** |  |  |
| S18 | Integration with prior work, implications,  transferability, and contribution(s) to the field | Short summary of main findings; explanation of how findings  and conclusions connect to, support, elaborate on, or challenge  conclusions of earlier scholarship; discussion of scope of application/  generalizability; identification of unique contribution(s) to scholarship  in a discipline or field | 19-24 |
| S19 | Limitations | Trustworthiness and limitations of findings | 20-21 |
|  | **Other** |  |  |
| S20 | Conflicts of interest | Potential sources of influence or perceived influence on study conduct  and conclusions; how these were managed | 25 |
| S21 | Funding | Sources of funding and other support; role of funders in data  collection, interpretation, and reporting | 25 |

The SRQR checklist is distributed with permission of Wolters Kluwer © 2014 by the Association of American Medical Colleges.

This checklist can be completed online using https://www.goodreports.org/, a tool made by the EQUATOR Network in collaboration with Penelope.ai
